# Supplementary material for: A novel polymerization of ultrathin sensitive imprinted film on surface plasmon resonance sensor
Source: Royal Society of Chemistry journal article supplement (doi:10.1039/c2an35819k), 2012-01-01
Supplement: c2an35819k.pdf [file c2an35819k.pdf]

1 **Electronic supplementary information**

2 **A novel polymerization of ultrathin sensitive imprinted film on**  
3 **surface plasmon resonance sensor**

4 **Jianwei Dong<sup>a,1</sup>, Yuan Peng<sup>b,1</sup>, Na Gao<sup>a</sup>, Jialei Bai<sup>b</sup>, Baoan Ning<sup>b</sup>, Ming Liu<sup>b,\*</sup> and Zhixian**

5 **Gao<sup>b,\*</sup>**

6 *<sup>a</sup> College of Food Science and Technology, Huazhong Agricultural University, Wuhan, 430070, China.*

7 *<sup>b</sup> Tianjin Key Laboratory of Risk Assessment and Control Technology for Environment and Food Safety, Institute of*  
8 *Health and Environment Medicine, Tianjin 300050, China*

9  
10 **Contents:**

11 **The principle of SPR sensor detection molecules**

12 **Table S1** Photoresist spinner operation parameters

13 **Table S2** SPR operation parameters

14 **Fig. S2** The SEM image of paste-grafted MIP film and self-assembly grafted  
15 MIP film

16  
17  
18  
19  
20  
21  
22  
23  
24  
25  
26  

---

\* Corresponding author: (Zhixian Gao) Tel.: +86 22 84655183, Fax: +86 22 84655183, E-mail address: [gaozhx@163.com](mailto:gaozhx@163.com); (Ming Liu) Tel.: +86 22 84655403, Fax: +86 22 84655403, E-mail address: [liumingb@163.com](mailto:liumingb@163.com).

<sup>1</sup> These authors contributed equally to this work.

27 **The principle of SPR sensor detection molecules**

28

29 SPR is an optoelectronic phenomenon occurring at a thin gold surface during  
30 total internal reflection of light. At a specific angle of incidence (resonance angle), the  
31 polarized light can interact with the delocalized electrons (surface plasmons) of the  
32 metal film, resulting in minimum reflected light intensity. The resonance angle  
33 strongly depends on the local refractive index of the medium in close proximity to the  
34 metal surface, which makes it possible to measure accurately the adsorption of  
35 molecules onto the metal surface and their eventual interactions with specific ligands.

36 The schematic diagram of SPR response to MG is shown as follow;

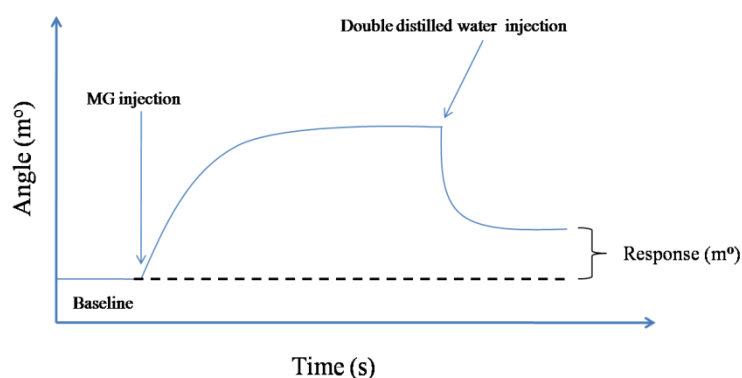

37

38 **Fig. S1 The schematic diagram of SPR response to MG**

39

40

41

42

43

44

45

46

47

48

49

50

51

52 **Table S1**

53 Photoresist spinner operation parameters

| Parameter                       | Setting                  |
|---------------------------------|--------------------------|
| P 17(the first rotation speed)  | 235 r min <sup>-1</sup>  |
| P 18(the second rotation speed) | 1271 r min <sup>-1</sup> |
| P 81(the first rotation time)   | 2 s                      |
| P 82(the second rotation time)  | 30 s                     |

54

55

56

57

58

59

60

61

62

63

64

65

66

67

68

69

70

71

72

73

74

75

76

77

78

79

80

81

82

83

84

85

86

87

88

89

90

91 **Table S2**

92 SPR operation parameters

| Parameter         | Setting    |
|-------------------|------------|
| Baseline time     | 120 s      |
| Association time  | 900 s      |
| Dissociation time | 200 s      |
| Regeneration time | 600 s      |
| Sample volume     | 50 $\mu$ L |

93  
94  
95  
96  
97  
98  
99  
100  
101  
102  
103  
104  
105  
106  
107  
108  
109  
110  
111  
112  
113  
114  
115  
116  
117  
118  
119  
120  
121  
122  
123  
124  
125  
126  
127  
128

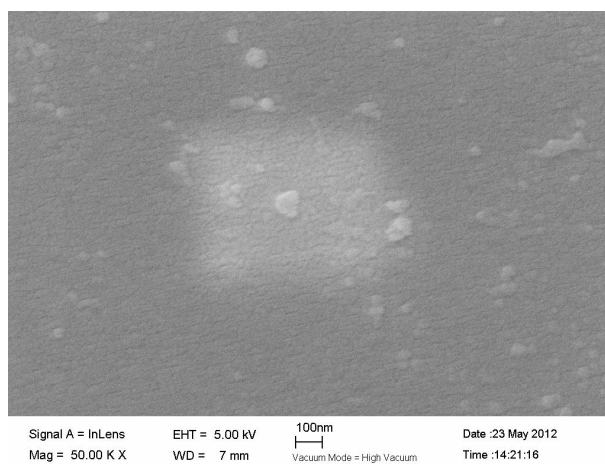

(A)

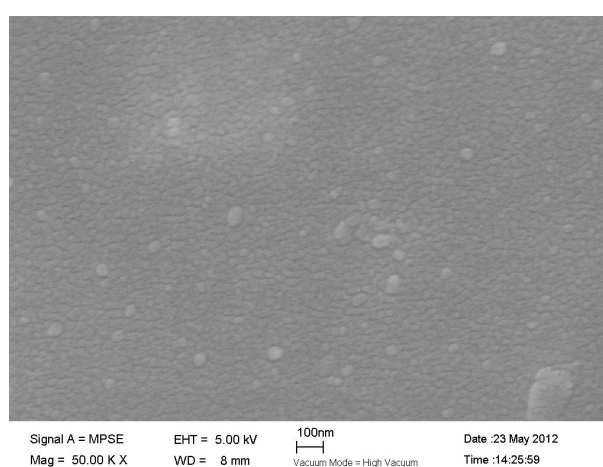

(B)

133 **Fig. S2 The SEM image of paste-grafted MIP film and self-assembly grafted MIP film. (A)**  
134 **paste-grafted MIP film; (B) self-assembly grafted MIP film**

135 The paste-grafted MIP film has a larger adsorption quantity to MG than the  
136 self-assembly grafted one. The thickness of the MIP film may be assumed to play an  
137 important role in the adsorption quantity of the sensor chip to the template molecule  
138 (MG). But it is not necessarily the only factor. The differences in surface area would  
139 be a contributing factor to the differences in responses, even though the difference  
140 between the surface morphology of two polymers cannot be observed by scanning  
141 electron microscopy.

142
